# Supplementary material for: National strategy for integrating palliative care into standard cardiac care for people living with heart failure: a position statement from the joint working group of the Swiss Societies of Cardiology and Palliative Care
Source: Frontiers journal article supplement (doi:10.3389/fcvm.2025.1548595), 2025-03-28
Supplement: Data_Sheet_1.pdf [file Data_Sheet_1.pdf]

## Supplementary files

Suppl. Figure 1. Available tools to assess the need for PC provision.(Based on <sup>18</sup>)

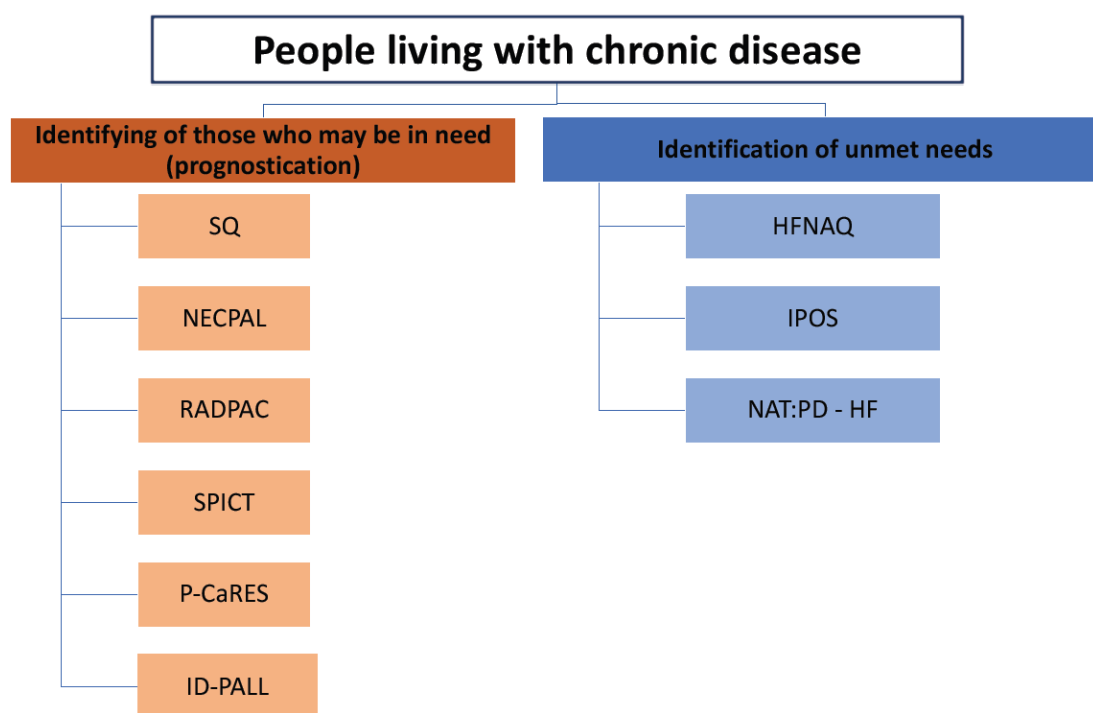

Abbreviations: SQ – **Surprise Question**<sup>8</sup>; NECPAL, **Necesidades Palliativas Programm**<sup>9</sup>, RADPAC, **Radbound indicators of Palliative Care needs**<sup>10</sup>; SPICT, **Supportive and PC Indicators Tool**<sup>11</sup>, P-CaRES, **Palliative Care and Rapid Emergency Screening**<sup>12</sup>, ID-PALL, **IDentification of patients in need of PALLiative care**<sup>13</sup>, HFNAQ, **Heart Failure Needs Assessment Questionnaire**<sup>14</sup>, IPOS - **Integrated Palliative care Outcome Scale**<sup>15</sup>, NAT:PD-HF, **Needs Assessment Tool: Progressive Disease – Heart Failure**<sup>17</sup>

Figure 2. The IDentification of patients in need of PALLiative care (ID Pall).<sup>16</sup>

### ID-PALL<sup>®</sup> G

#### IDentification of patients in need of General Palliative Care

General palliative care is provided by professionals without specialized palliative care training in all care settings and contexts

Please respond to all of the statements below relative to the patient's **current situation**:

|                                                                                                                                                                                       |                                                          |
|---------------------------------------------------------------------------------------------------------------------------------------------------------------------------------------|----------------------------------------------------------|
| 1. Would you be surprised if this patient died in the next <b>12</b> months?                                                                                                          | <input type="checkbox"/> Yes <input type="checkbox"/> No |
| 2. The patient has a progressive illness or group of illnesses or comorbidities that <b>limits their life expectancy</b><br><br><b>AND</b> presents (select all that are applicable): | <input type="checkbox"/> Yes <input type="checkbox"/> No |

|                                                                                                                                                                                                                                                                                                                                                                                                                                                                                                                                                                                                                                                                |                                                                                                                                                                                                       |
|----------------------------------------------------------------------------------------------------------------------------------------------------------------------------------------------------------------------------------------------------------------------------------------------------------------------------------------------------------------------------------------------------------------------------------------------------------------------------------------------------------------------------------------------------------------------------------------------------------------------------------------------------------------|-------------------------------------------------------------------------------------------------------------------------------------------------------------------------------------------------------|
| <p><b>a decline in general functioning</b> (with limited reversibility and an increase in need for support in day to day activities)</p> <p><u>OR</u></p> <p><b>a pronounced instability over the last 6 months</b> (defined by: one uncontrolled symptom from the patient's point of view OR a pressure ulcer category <math>\geq 3</math> OR more than one acute delirium episode, infection, unscheduled hospitalisation or fall)</p> <p><u>OR</u></p> <p><b>psychosocial or existential suffering</b> (of the patient or people close to them)</p> <p><u>OR</u></p> <p><b>the need for support</b> in making decisions during the final stages of life</p> | <p><input type="checkbox"/> Yes   <input type="checkbox"/> No</p> <p><input type="checkbox"/> Yes   <input type="checkbox"/> No</p> <p><input type="checkbox"/> Yes   <input type="checkbox"/> No</p> |
| 3. Current or planned interruption of treatments with curative intent or <b>vital support measures</b> (e.g.: artificial ventilation, dialysis, artificial feeding, or hydration)                                                                                                                                                                                                                                                                                                                                                                                                                                                                              | <input type="checkbox"/> Yes <input type="checkbox"/> No                                                                                                                                              |
| 4. Request for <b>comfort care or palliative care</b> from the patient, people close to them, or health professionals                                                                                                                                                                                                                                                                                                                                                                                                                                                                                                                                          | <input type="checkbox"/> Yes <input type="checkbox"/> No                                                                                                                                              |

If you have ticked:

**NO to question 1 OR YES to at least ONE of the statements 2, 3, or 4**, the patient is likely to require general palliative care.

Please complete the ID-PALL S questionnaire on the next page and refer to the general palliative care practice recommendations.

## ID-PALL<sup>®</sup> S

**ID**entification of patients in need of **S**pecialist **P**alliative Care.

Specialized palliative care is provided by or with professionals specialized in palliative care.

Please respond to all of the statements below, relative to the patient's **current situation, only when the response to the ID-PALL G is positive:**

|                                                                                                                                                                                                                                                         |                                                          |
|---------------------------------------------------------------------------------------------------------------------------------------------------------------------------------------------------------------------------------------------------------|----------------------------------------------------------|
| 1. Presence of <b>at least one severe and persistent symptom</b> , including pain, that has not responded satisfactorily to treatment within 48 h.                                                                                                      | <input type="checkbox"/> Yes <input type="checkbox"/> No |
| 2. <b>Difficulties in evaluating</b> physical symptoms or psychological, social difficulties or spiritual distress                                                                                                                                      | <input type="checkbox"/> Yes <input type="checkbox"/> No |
| 3. <b>Disagreement or uncertainty</b> on the part of the patient, people close to them or health professionals regarding, for example, medical treatments, resuscitation code or complex decisions                                                      | <input type="checkbox"/> Yes <input type="checkbox"/> No |
| 4. The patient has <b>severe psychosocial or existential suffering</b> (e.g.: marked symptoms of anxiety or depression, feelings of isolation or of being a burden, loss of meaning or hope, desire to die, or has made a request for assisted suicide) | <input type="checkbox"/> Yes <input type="checkbox"/> No |
| 5. People close to the patient experience <b>severe psychosocial or existential suffering</b> (e.g.: marked symptoms of anxiety or depression, major feelings of                                                                                        | <input type="checkbox"/> Yes <input type="checkbox"/> No |

|                                                                                                                                                              |                                                          |
|--------------------------------------------------------------------------------------------------------------------------------------------------------------|----------------------------------------------------------|
| exhaustion, major disruption to the functioning of the family system, loss of meaning or hope)                                                               |                                                          |
| 6. <b>Palliative sedation</b> is envisaged (to relieve an intolerable refractory symptom by decreasing the level of consciousness using specific medication) | <input type="checkbox"/> Yes <input type="checkbox"/> No |
| 7. <b>Advance care plan or advance directives</b> are difficult to establish with the patient and/or people close to them                                    | <input type="checkbox"/> Yes <input type="checkbox"/> No |
| 8. In your opinion, the patient, people close to them or health professionals could benefit from the <b>intervention of palliative care specialists</b> .    | <input type="checkbox"/> Yes <input type="checkbox"/> No |

If you have ticked **YES to ONE of the above statements**, the patient is likely to benefit from a consultation with a specialist PC team.

Suppl. Figure 3. The Needs Assessment Tool: Progressive Disease – Heart Failure (NAT:PD-HF).<sup>17</sup>

# NEEDS ASSESSMENT TOOL : PROGRESSIVE DISEASE HEART FAILURE (NAT: PD-HF)

COMPLETE ALL SECTIONS

PATIENT NAME: \_\_\_\_\_

DATE: \_\_\_\_\_ DIAGNOSIS: \_\_\_\_\_

PATIENT/ADDRESS LABEL

## SECTION 1: PRIORITY REFERRAL FOR FURTHER ASSESSMENT

|                                                                                                      | Yes | No | If yellow boxes are ticked, consider assessment by SPCS |
|------------------------------------------------------------------------------------------------------|-----|----|---------------------------------------------------------|
| 1. Does the patient have a caregiver readily available if required?                                  |     |    |                                                         |
| 2. Has the patient or caregiver requested a referral to a specialist palliative care service (SPCS)? |     |    |                                                         |
| 3. Do you require assistance in managing the care of this patient and/or family?                     |     |    |                                                         |

## SECTION 2: PATIENT WELLBEING (Refer to the back page for assistance)

|                                                                                                                                                                    | Level of Concern                                                                                                                                                                                                                                          |                |             | Action Taken                                                                                        |                                   |                   |
|--------------------------------------------------------------------------------------------------------------------------------------------------------------------|-----------------------------------------------------------------------------------------------------------------------------------------------------------------------------------------------------------------------------------------------------------|----------------|-------------|-----------------------------------------------------------------------------------------------------|-----------------------------------|-------------------|
|                                                                                                                                                                    | None                                                                                                                                                                                                                                                      | Some/Potential | Significant | Directly managed                                                                                    | Managed by other care team member | Referral required |
| 1. Is the patient experiencing unresolved physical symptoms (including problems with breathlessness, pain, fatigue, nausea, oedema, insomnia or cough)?            |                                                                                                                                                                                                                                                           |                |             |                                                                                                     |                                   |                   |
| 2. Does the patient have problems with daily living activities?                                                                                                    |                                                                                                                                                                                                                                                           |                |             |                                                                                                     |                                   |                   |
| 3. Does the patient have psychological symptoms that are interfering with wellbeing or relationships?                                                              |                                                                                                                                                                                                                                                           |                |             |                                                                                                     |                                   |                   |
| 4. Does the patient have concerns about how to manage his/her medication and treatment regimes?                                                                    |                                                                                                                                                                                                                                                           |                |             |                                                                                                     |                                   |                   |
| 5. Does the patient have concerns about spiritual or existential issues?                                                                                           |                                                                                                                                                                                                                                                           |                |             |                                                                                                     |                                   |                   |
| 6. Does the patient have financial or legal concerns that are causing distress or require assistance?                                                              |                                                                                                                                                                                                                                                           |                |             |                                                                                                     |                                   |                   |
| 7. From the health delivery point of view, are there health beliefs, cultural or social factors involving the patient or family that are making care more complex? |                                                                                                                                                                                                                                                           |                |             |                                                                                                     |                                   |                   |
| 8. Does the patient require information about: (tick any options that are relevant)                                                                                | <input type="checkbox"/> The prognosis <input type="checkbox"/> Treatment options <input type="checkbox"/> Advance directive/resuscitation preferences<br><input type="checkbox"/> Heart disease <input type="checkbox"/> Medical/health/support services |                |             | <input type="checkbox"/> Financial/legal issues<br><input type="checkbox"/> Social/emotional issues |                                   |                   |

COMMENTS: \_\_\_\_\_

## SECTION 3: ABILITY OF CAREGIVER OR FAMILY TO CARE FOR PATIENT (Refer to the back page for assistance)

| Who provided this information? (please tick one)<br><input type="checkbox"/> Patient <input type="checkbox"/> Caregiver <input type="checkbox"/> Both                 | Level of Concern                                                                                                                                                                                                                                                                                                                    |                |             | Action Taken                                                                            |                                   |                   |
|-----------------------------------------------------------------------------------------------------------------------------------------------------------------------|-------------------------------------------------------------------------------------------------------------------------------------------------------------------------------------------------------------------------------------------------------------------------------------------------------------------------------------|----------------|-------------|-----------------------------------------------------------------------------------------|-----------------------------------|-------------------|
|                                                                                                                                                                       | None                                                                                                                                                                                                                                                                                                                                | Some/Potential | Significant | Directly managed                                                                        | Managed by other care team member | Referral required |
| 1. Is the caregiver or family distressed about the patient's physical symptoms?                                                                                       |                                                                                                                                                                                                                                                                                                                                     |                |             |                                                                                         |                                   |                   |
| 2. Is the caregiver or family having difficulty providing physical care?                                                                                              |                                                                                                                                                                                                                                                                                                                                     |                |             |                                                                                         |                                   |                   |
| 3. Is the caregiver or family having difficulty coping?                                                                                                               |                                                                                                                                                                                                                                                                                                                                     |                |             |                                                                                         |                                   |                   |
| 4. Is the caregiver have difficulty managing the patient's medication and treatment regimes?                                                                          |                                                                                                                                                                                                                                                                                                                                     |                |             |                                                                                         |                                   |                   |
| 5. Does the caregiver or family have financial or legal concerns that are causing distress or require assistance?                                                     |                                                                                                                                                                                                                                                                                                                                     |                |             |                                                                                         |                                   |                   |
| 6. Is the family currently experiencing problems that are interfering with their functioning or inter-personal relationships, or is there a history of such problems? |                                                                                                                                                                                                                                                                                                                                     |                |             |                                                                                         |                                   |                   |
| 7. Does the caregiver require information: (tick any options that are relevant)                                                                                       | <input type="checkbox"/> The prognosis <input type="checkbox"/> Advance directive/resuscitation preferences <input type="checkbox"/> Medical/health/support services<br><input type="checkbox"/> Treatment options <input type="checkbox"/> What to do in event of patient's death <input type="checkbox"/> Social/emotional issues |                |             | <input type="checkbox"/> Heart disease <input type="checkbox"/> Financial /legal issues |                                   |                   |

COMMENTS: \_\_\_\_\_

## SECTION 4: CAREGIVER WELLBEING (Refer to the back page for assistance)

| Who provided this information? (please tick one)<br><input type="checkbox"/> Patient <input type="checkbox"/> Caregiver <input type="checkbox"/> Both                      | Level of Concern |                |             | Action Taken     |                                   |                   |
|----------------------------------------------------------------------------------------------------------------------------------------------------------------------------|------------------|----------------|-------------|------------------|-----------------------------------|-------------------|
|                                                                                                                                                                            | None             | Some/Potential | Significant | Directly managed | Managed by other care team member | Referral required |
| 1. Is the caregiver or family experiencing physical, practical, spiritual, existential or psychological problems that are interfering with their wellbeing or functioning? |                  |                |             |                  |                                   |                   |
| 2. Is the caregiver or family experiencing grief over the impending or recent death of the patient that is interfering with their wellbeing or functioning?                |                  |                |             |                  |                                   |                   |

COMMENTS: \_\_\_\_\_

## IF REFERRAL REQUIRED FOR FURTHER ASSESSMENT OR CARE, PLEASE COMPLETE THIS SECTION

|                                                                                                                                                                                                                                                                                                  |
|--------------------------------------------------------------------------------------------------------------------------------------------------------------------------------------------------------------------------------------------------------------------------------------------------|
| 1. Referral to: (Name) _____                                                                                                                                                                                                                                                                     |
| 2. Referral to: (Specialty) <input type="checkbox"/> General practitioner <input type="checkbox"/> Social worker <input type="checkbox"/> Psychologist <input type="checkbox"/> Specialist palliative care service<br><input type="checkbox"/> Cardiologist <input type="checkbox"/> Other _____ |
| 3. Priority of assessment needed: <input type="checkbox"/> Urgent (within 24 hours) <input type="checkbox"/> Semi-Urgent (2-7 days) <input type="checkbox"/> Non-Urgent (next available)                                                                                                         |
| 4. Discussed the referral with the client. <input type="checkbox"/> Yes <input type="checkbox"/> No                                                                                                                                                                                              |
| 5. Client consented to the referral. <input type="checkbox"/> Yes <input type="checkbox"/> No                                                                                                                                                                                                    |
| 6. Referral from: Name: _____ Position: _____ Signature: _____                                                                                                                                                                                                                                   |

Suppl. Figure 4. Needs assessment and assignment of responsibility for PC provision (modified from<sup>2</sup>)

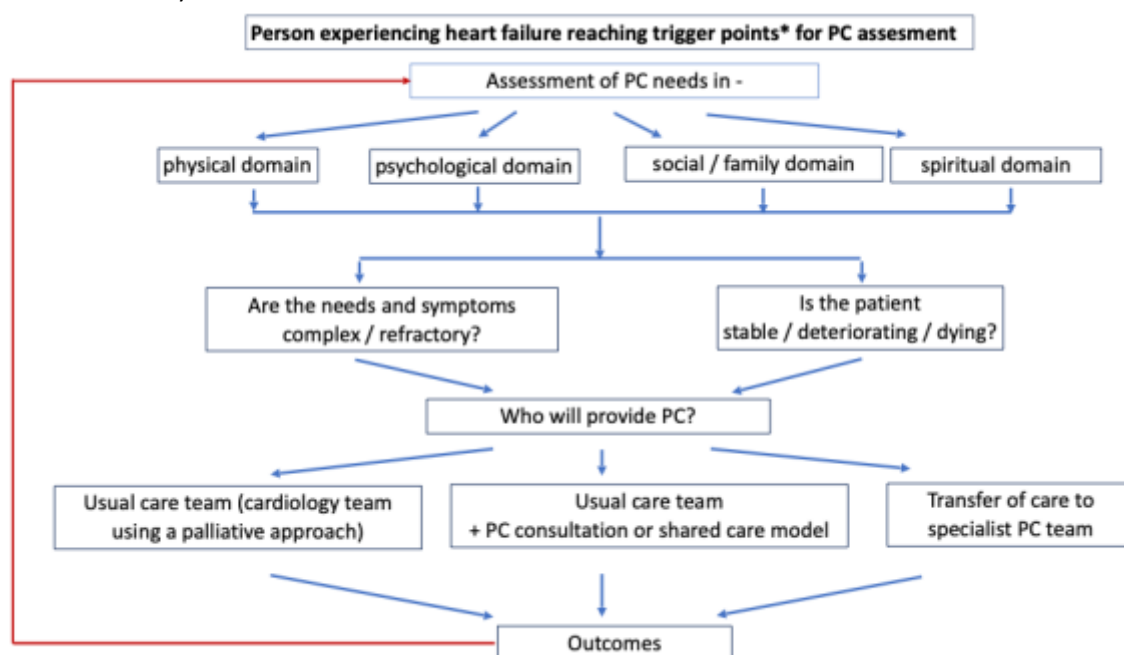

\*triggers for performing needs assessment are listed in Table 1.
